# Supplementary material
Source: PubMed Central journal article supplement (PMC3992672)
Supplement: 1404545111_pnas.201404545SI.pdf [file 1404545111_pnas.201404545SI.pdf]

# Supporting Information

Supporting Information Corrected May 05, 2014

Chen et al. 10.1073/pnas.1404545111

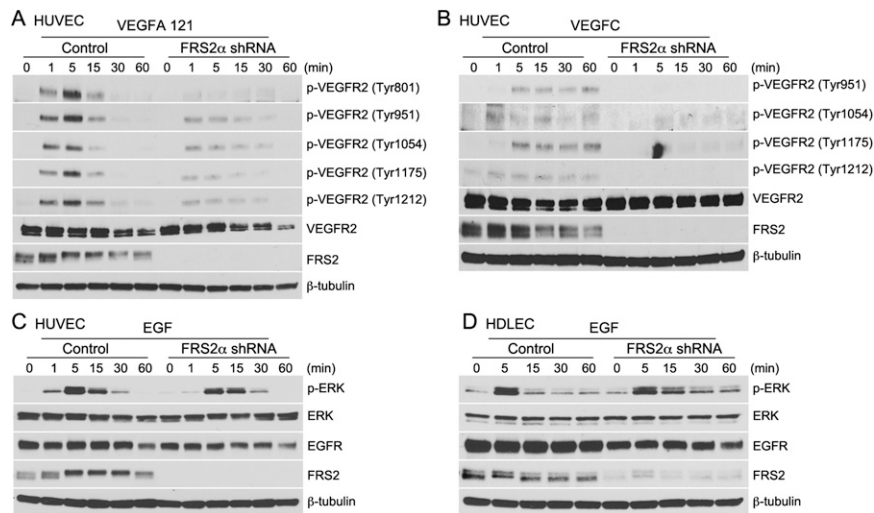

**Fig. S1.** FRS2 $\alpha$  knockdown in HUVEC inhibits vascular endothelial growth factor (VEGF) A<sub>121</sub> and VEGF-C-dependent signaling, but does not impair EGF signaling. (A and B) Control and FRS2 $\alpha$  knockdown HUVEC were serum starved overnight and treated with VEGF-A<sub>121</sub> (50 ng/mL) or VEGF-C (50 ng/mL) for the indicated times. Cell lysates were blotted with p-VEGFR2, VEGFR2, and FRS2 $\alpha$  antibodies. (C and D) Control and FRS2 $\alpha$  knockdown HUVEC and HDLEC were serum starved overnight and treated with EGF (50 ng/mL) for the indicated times. Cell lysates were blotted with p-ERK, ERK, EGFR, and FRS2 $\alpha$  antibodies.

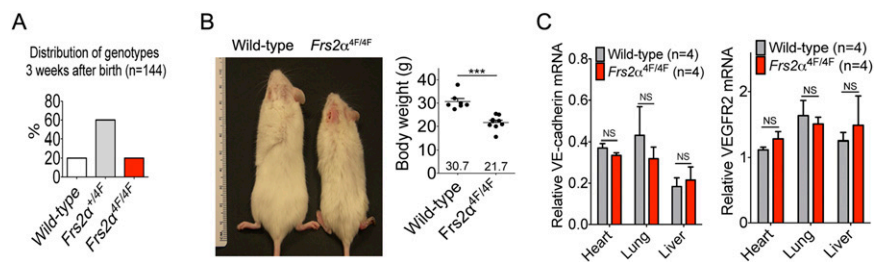

**Fig. S2.** *Frs2 $\alpha$ <sup>4F/4F</sup>* mutant mice have normal baseline vascular density. (A) Total genotype distribution from all heterozygous crosses from *Frs2 $\alpha$ <sup>+/-4F</sup>* intercrosses: 20% wild-type, 60% *Frs2 $\alpha$ <sup>+/4F</sup>*, and 20% *Frs2 $\alpha$ <sup>4F/4F</sup>*. (B) Body weight analysis of wild-type ( $n = 6$ , average weight = 30.7 g) and *Frs2 $\alpha$ <sup>4F/4F</sup>* ( $n = 8$ ; average weight = 21.7 g) mice. \*\*\* $P < 0.001$ . (C) Quantitative real-time PCR quantitation of endothelial cell marker gene expression in primary mouse heart, lung, and liver EC isolated from wild-type and *Frs2 $\alpha$ <sup>4F/4F</sup>* mice (NS, not significant compared with control).  $\beta$ -actin was used to normalize the variability in template loading.

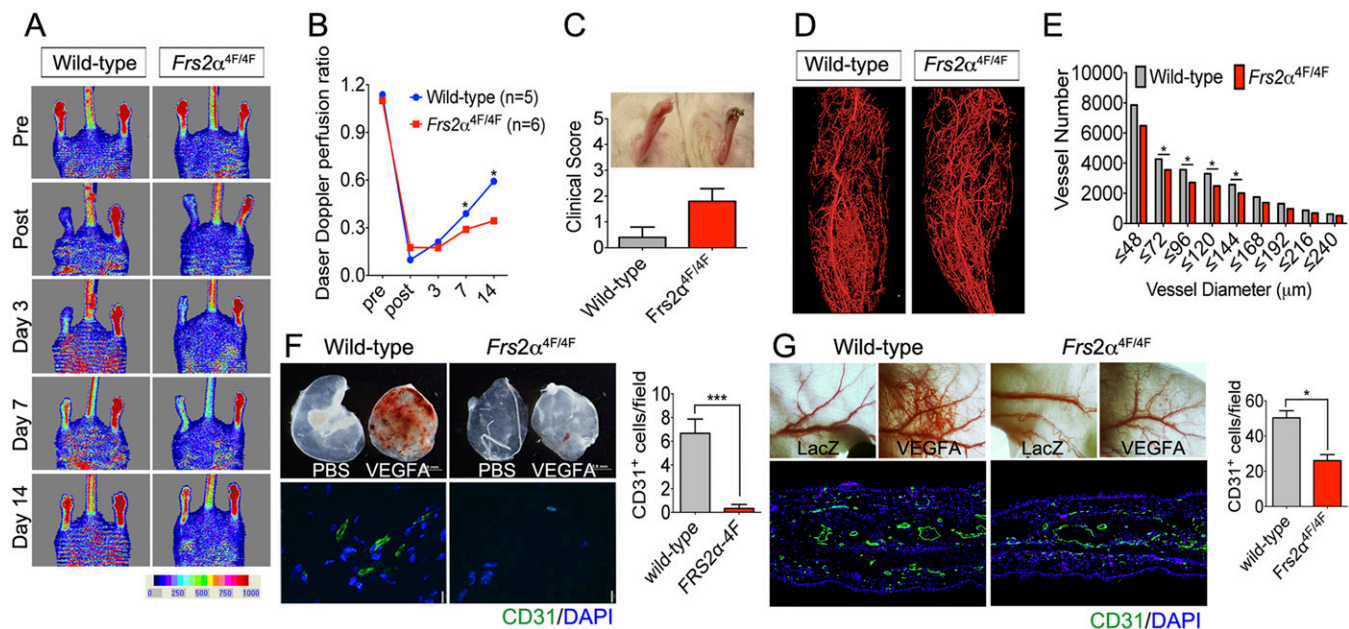

**Fig. S3.** *Frs2 $\alpha$ <sup>4F/4F</sup>* mutant mice have arteriogenesis and angiogenesis defects. (A) Laser-Doppler images showing blood flow before and after the induction of ischemia to the left hindlimb in wild-type ( $n = 5$ ) and *Frs2 $\alpha$ <sup>4F/4F</sup>* ( $n = 6$ ) mice. (B) Laser-Doppler analysis of blood flow recovery in the left foot, expressed as a ratio of blood flow in left to right foot (L/R).  $*P < 0.05$ , wild-type vs. *Frs2 $\alpha$ <sup>4F/4F</sup>*. (C) In *Frs2 $\alpha$ <sup>4F/4F</sup>* mice, clinical score indicated a severe phenotype, leading to necrosis of limb. (D) Representative reconstructed micro-CT images of ischemic legs ( $16 \mu\text{m}$  resolution;  $n = 3$ ) from wild-type and *Frs2 $\alpha$ <sup>4F/4F</sup>* mice. (E) Quantitative analysis of micro-CT images in the calf, presented as total number of vascular structures in 250 z-axis slices ( $n = 3$  per group). Data are mean  $\pm$  SEM. (F) Matrigel mixed with either PBS or VEGF-A<sub>165</sub> (50 ng/mL) were placed s.c. in wild-type or *Frs2 $\alpha$ <sup>4F/4F</sup>* mice. On day 7, matrigel plugs were sectioned, and the number of vessels was counted ( $***P < 0.001$  compared with control) ( $n = 3$  mice per group). (G) Wild-type and *Frs2 $\alpha$ <sup>4F/4F</sup>* mice were treated with  $1 \times 10^9$  pfu of Ad-LacZ or Ad-VEGF-A<sub>164</sub> virus. VEGF-A-induced angiogenesis was recorded at day 7 by using a stereomicroscope and fluorescent scope. On day 7, mouse ears were sectioned, and the number of vessels was counted ( $*P < 0.05$  compared with control) ( $n = 3$  mice per group).
